# Supplementary material for: Attomolar Detection of Botulinum Toxin Type A in Complex Biological Matrices
Source: PubMed Central journal article supplement (PMC2323579; doi:10.1371/journal.pone.0002041), 2008-04-30
Supplement: pone.0002041.s001.pdf [file pone.0002041.s001.pdf]

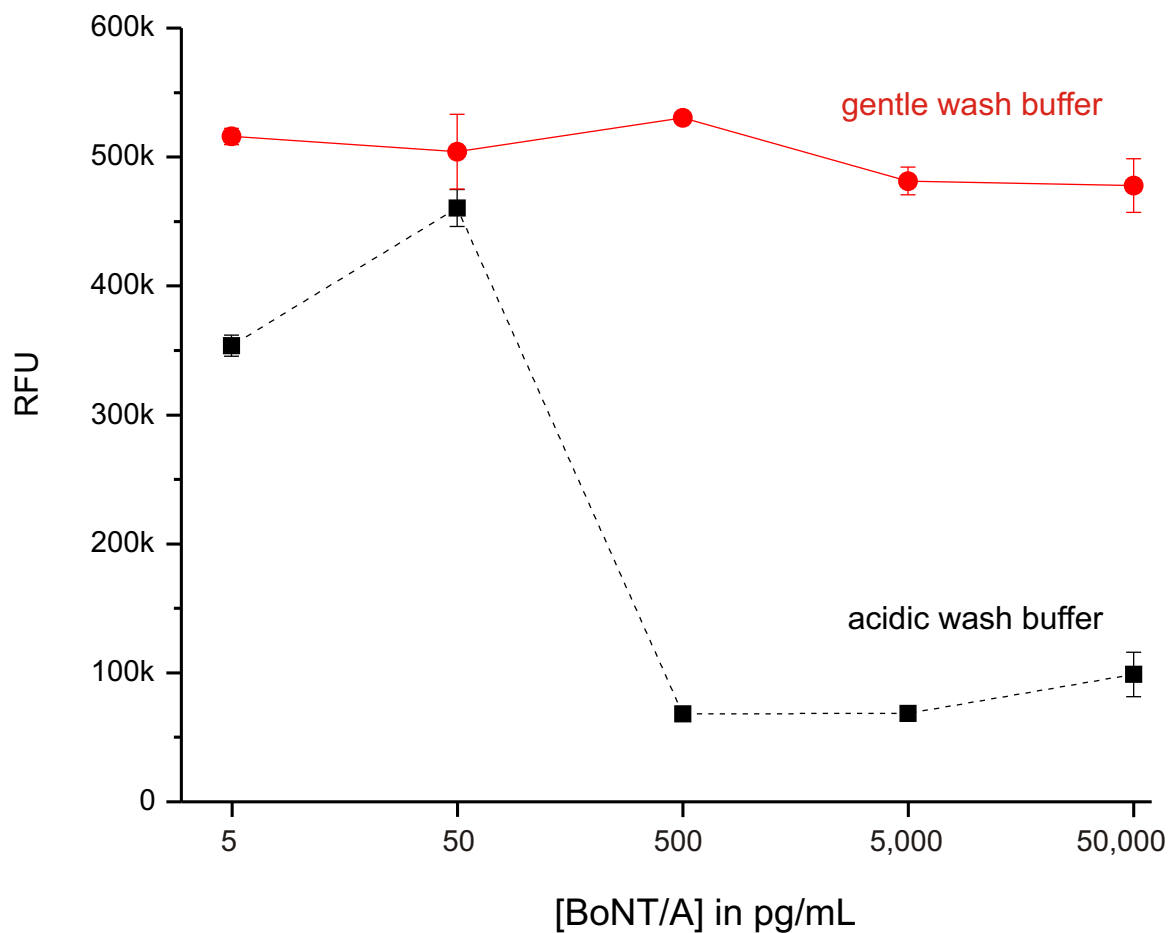

**Figure S1:** The capture antibodies are altered when the beads are washed with an acidic buffer (pH 2.8) following IgG-to-protein A binding and crosslinking. As a result the relative fluorescence intensity of the assay is reduced in presence of BoNT/A at concentrations  $> 50$  pg/mL, presumably due to unspecific degradation of the antibodies by the metalloprotease.
