# Supplementary material for: Attomolar Detection of Botulinum Toxin Type A in Complex Biological Matrices
Source: PubMed Central journal article supplement (PMC2323579; doi:10.1371/journal.pone.0002041), 2008-04-30
Supplement: pone.0002041.s003.pdf [file pone.0002041.s003.pdf]

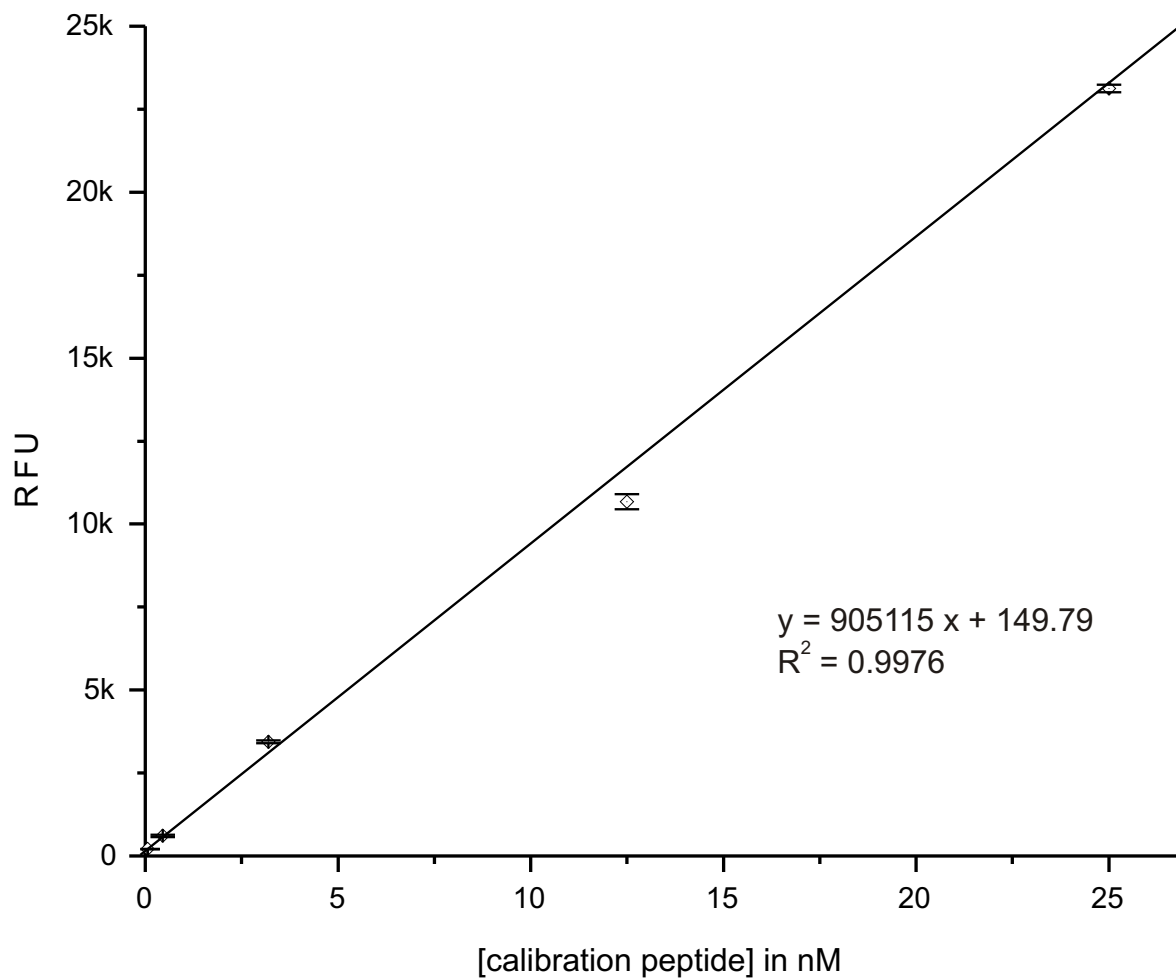

**Figure S3:** Standard curve of the fluorescence signal of the unquenched calibration peptide, which is structurally identical to the FITC-containing cleavage product resulting from BoNT/A hydrolysis of SNAPtide by BoNT/A;  $y$  in RFU;  $x$  in nM;  $R$  is the correlation coefficient
